# Supplementary material for: A highly efficient synthesis of the DEFG-ring system of rubriflordilactone B
Source: Royal Society of Chemistry journal article supplement (doi:10.1039/c6qo00241b), 2016-10-18

# A Highly Efficient Synthesis of the DEFG-Ring System of Rubriflordilactone B

Yong Wang, Yuhan Zhang, Zhongle Li, Zhenjie Yang, and Zhixiang Xie\*

State Key Laboratory of Applied Organic Chemistry & College of Chemistry and Chemical  
Engineering, Lanzhou University, Lanzhou 730000, P. R. China

\*E-mail: xiezx@lzu.edu.cn.

## Table of Contents

|                                                                    |        |
|--------------------------------------------------------------------|--------|
| 1. General information                                             | S1     |
| 2. <sup>1</sup> H and <sup>13</sup> C NMR spectra of new compounds | S2—S11 |

**1. General information:** Oxygen- and moisture-sensitive reactions were carried out under argon atmosphere. Solvents were purified and dried by standard methods prior to use. All commercially available reagents were used without further purification unless otherwise noted. Column chromatography was performed on silica gel (200-300 mesh). NMR spectra were recorded on Bruker 400 MHz and Oxford 600 MHz spectrometers in the CDCl<sub>3</sub> or acetone d<sub>6</sub>. Chemical shifts are reported as  $\delta$  values relative to internal chloroform ( $\delta$  7.27 for <sup>1</sup>H NMR and 77.00 for <sup>13</sup>C NMR) and acetone-d<sub>6</sub> ( $\delta$  2.05 for <sup>1</sup>H NMR and 29.92 for <sup>13</sup>C NMR). High resolution mass spectra (HRMS) were obtained on a 4G mass spectrometer by using electrospray ionization (ESI) analyzed by quadrupole time-of-flight (Q-TOF). Optical rotations were measured on a Rudolph Autoplo IV polarimeter.

## 2. $^1\text{H}$ and $^{13}\text{C}$ NMR spectra of new compounds

$^1\text{H}$  and  $^{13}\text{C}$  NMR spectra of compound 6:

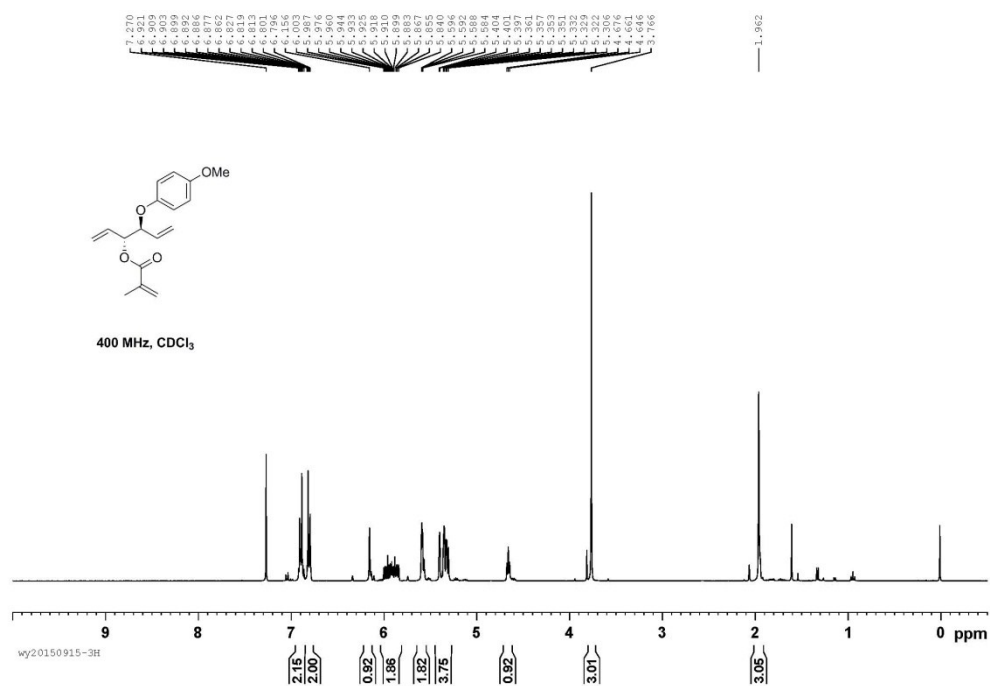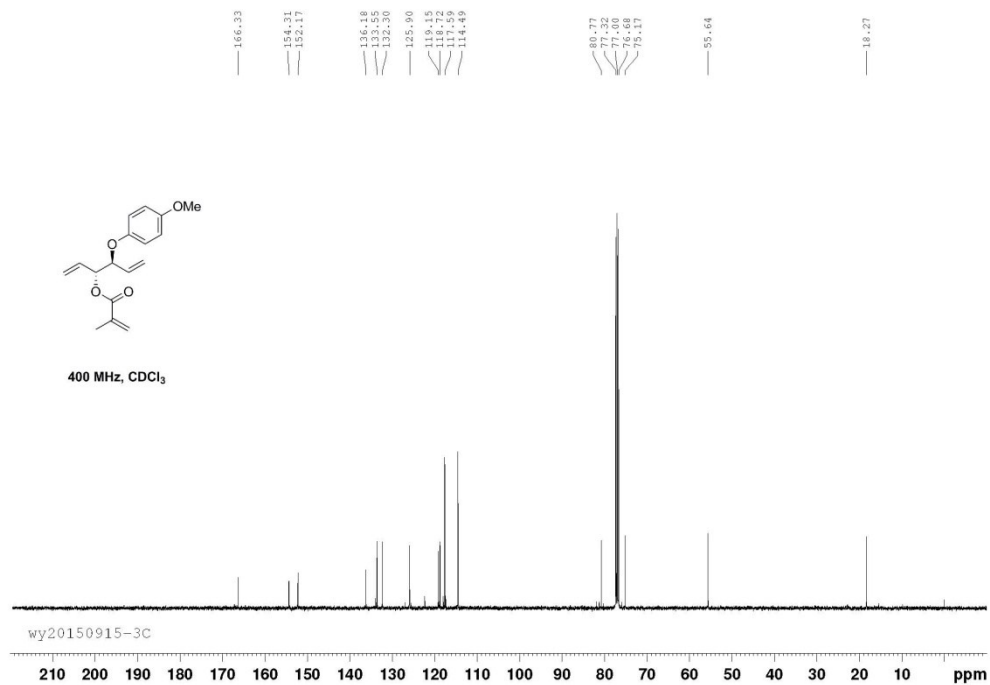

$^1\text{H}$  and  $^{13}\text{C}$  NMR spectra of compound 5:

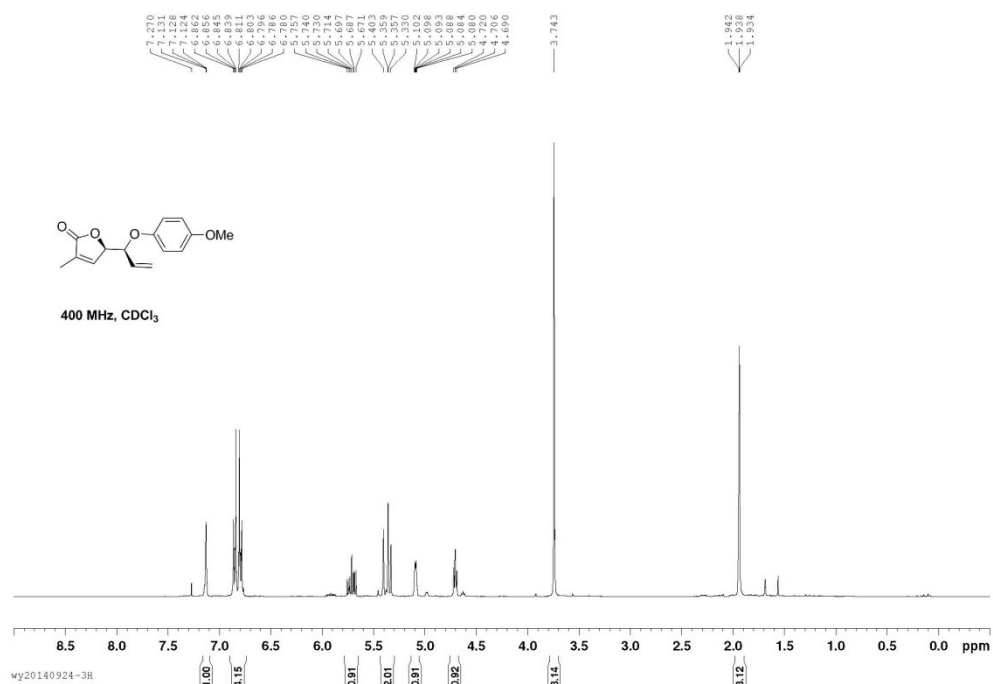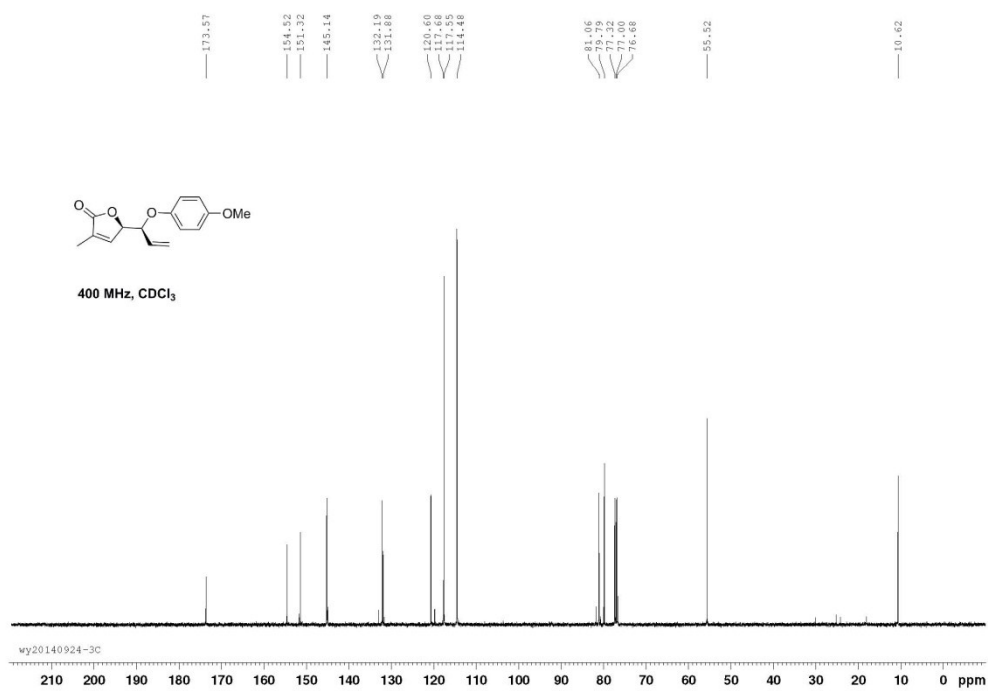

<sup>1</sup>H and <sup>13</sup>C NMR spectra of compound 4:

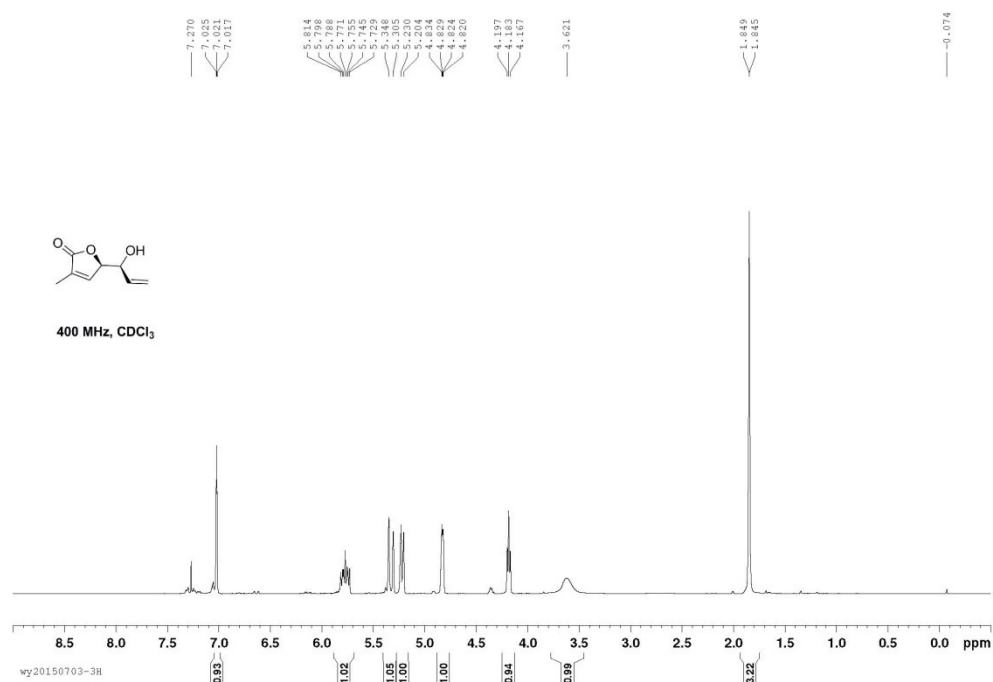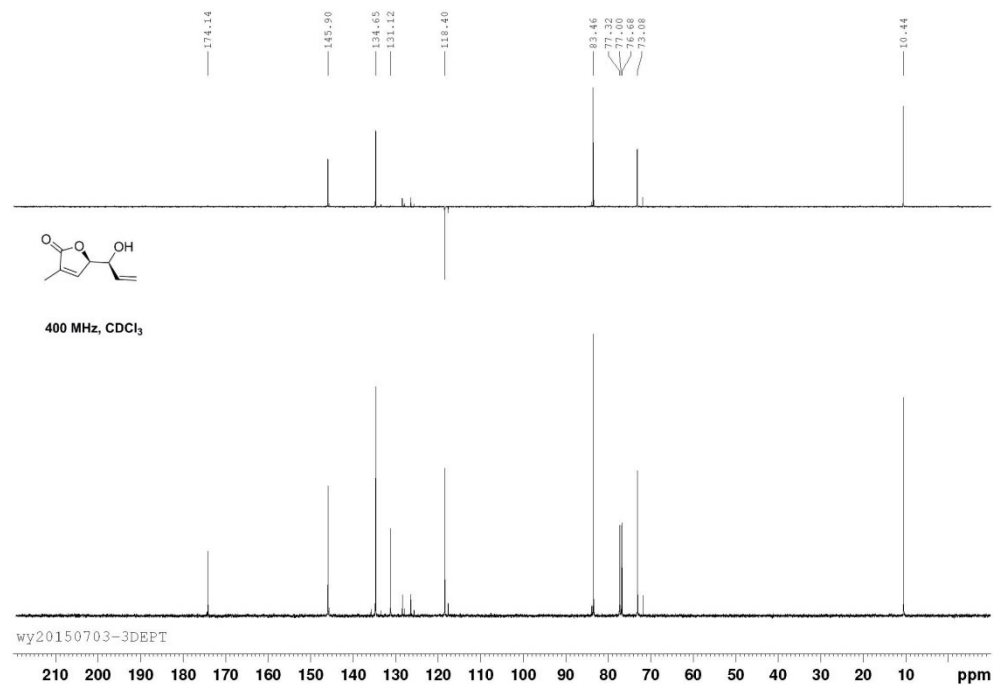

$^1\text{H}$  and  $^{13}\text{C}$  NMR spectra of compound **13**:

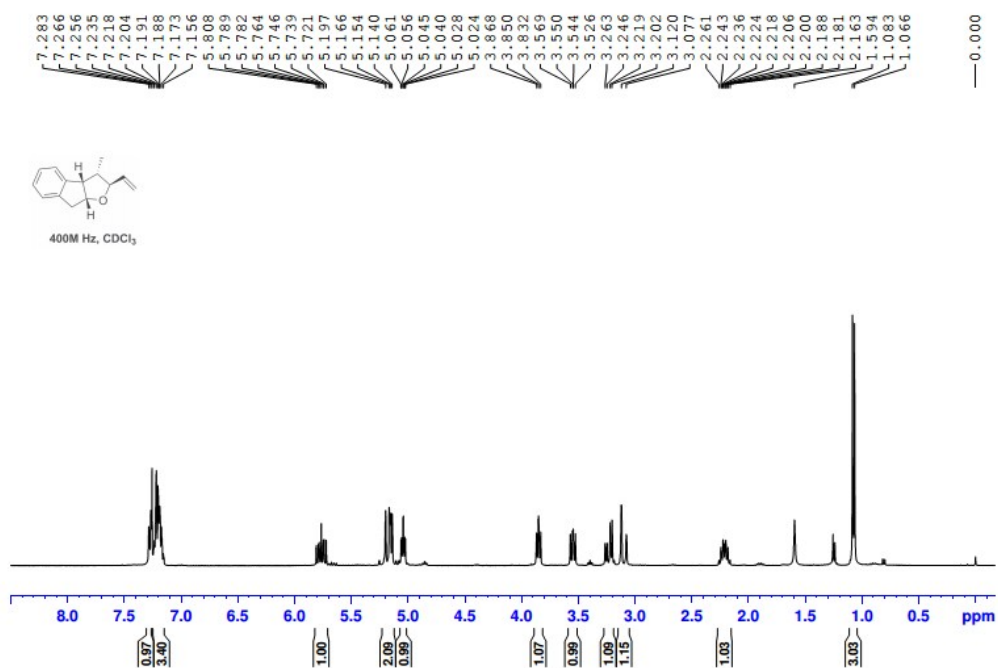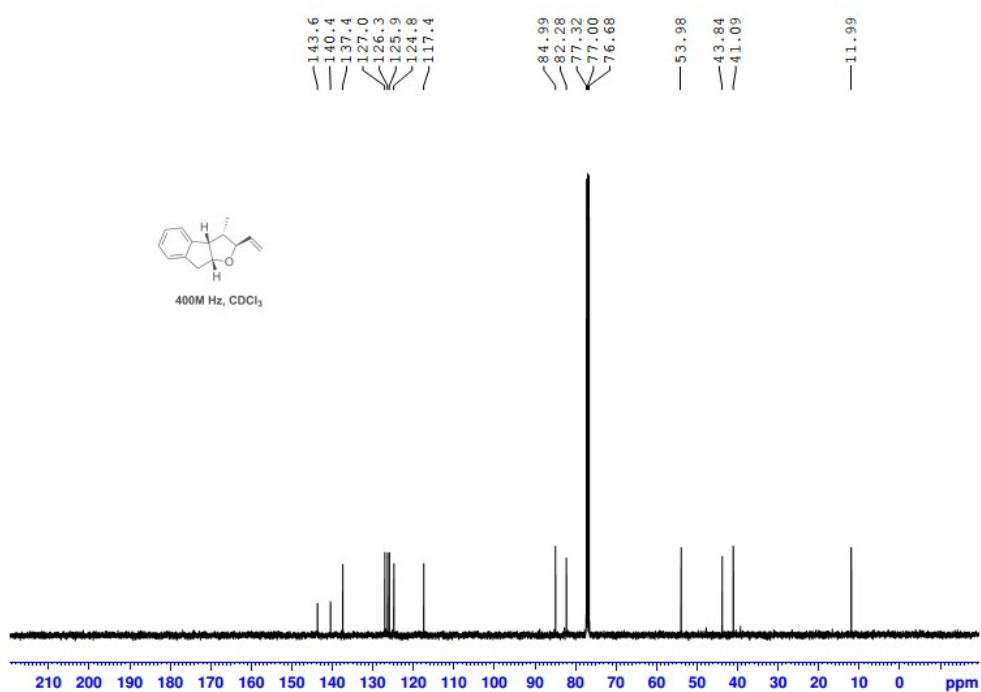

$^1\text{H}$  and  $^{13}\text{C}$  NMR spectra of compounds **13** and **13'**:

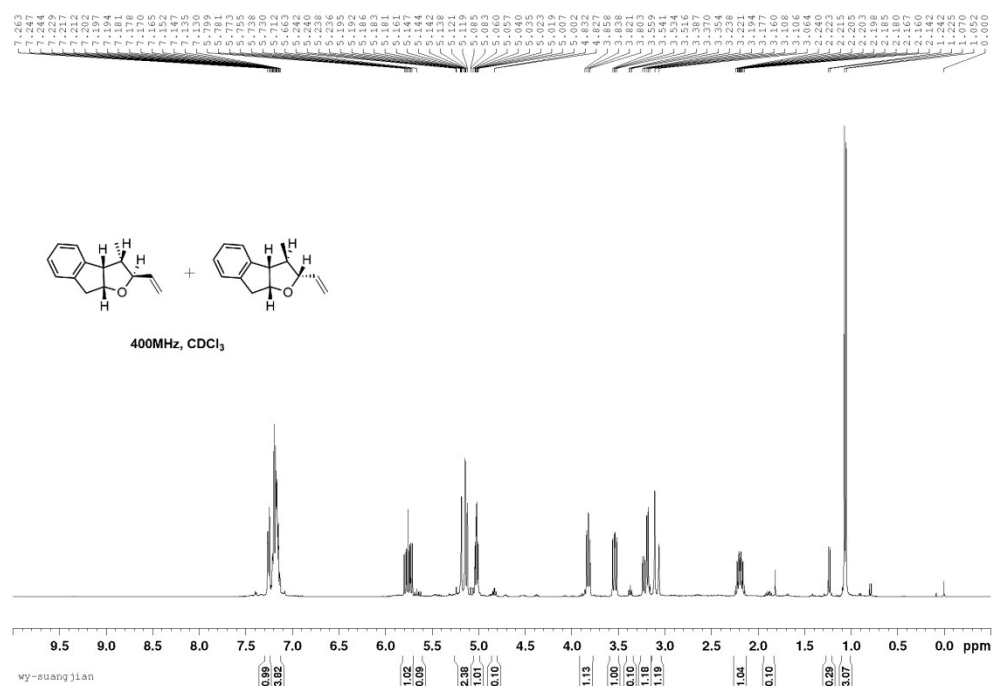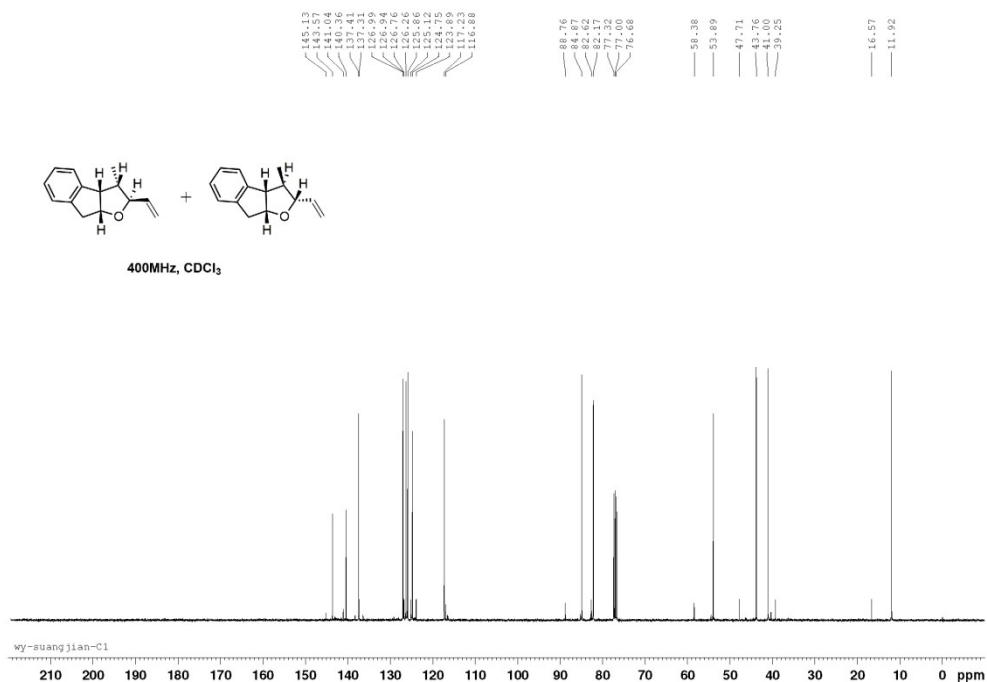

NOE of compound **13**:

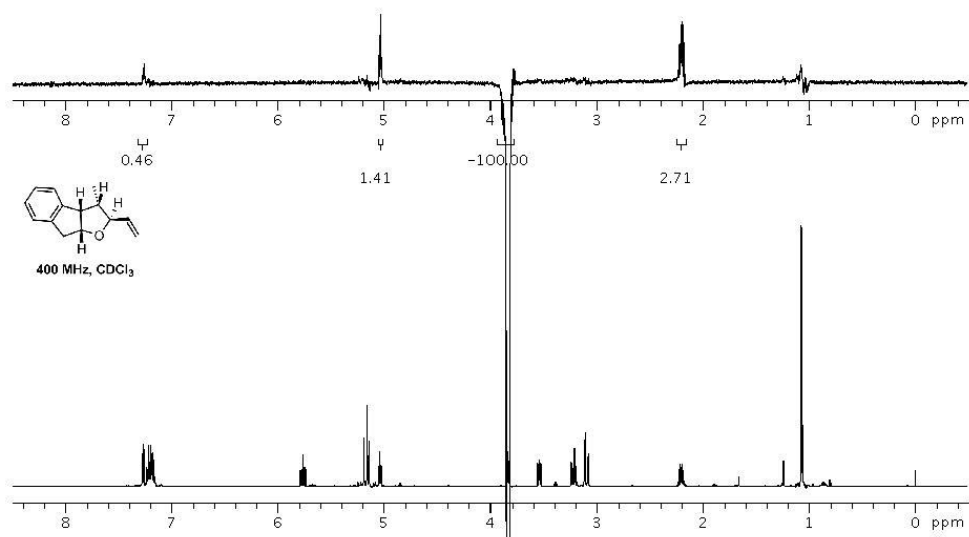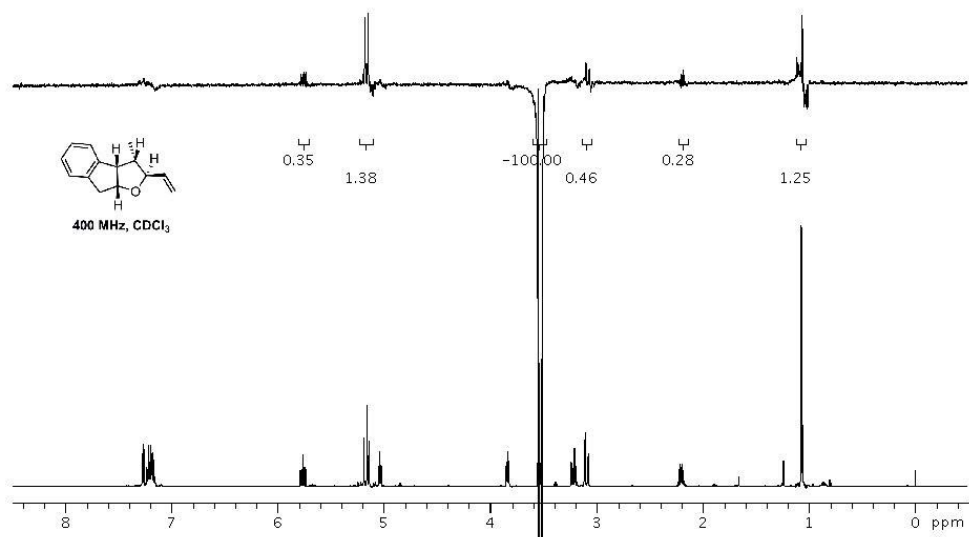

<sup>1</sup>H and <sup>13</sup>C NMR spectra and NOE of compound 14:

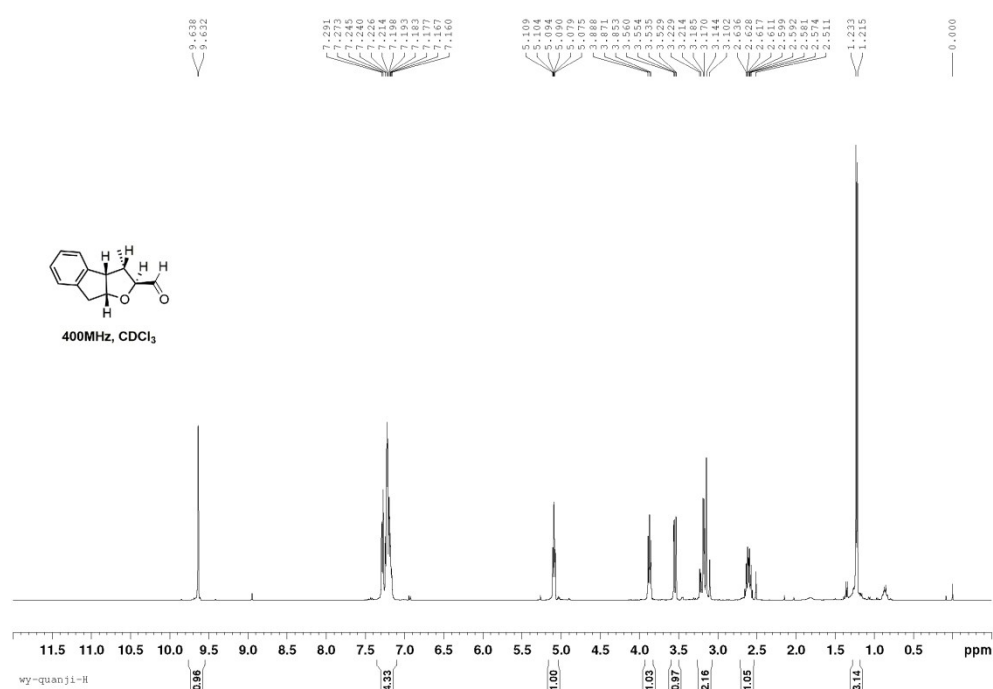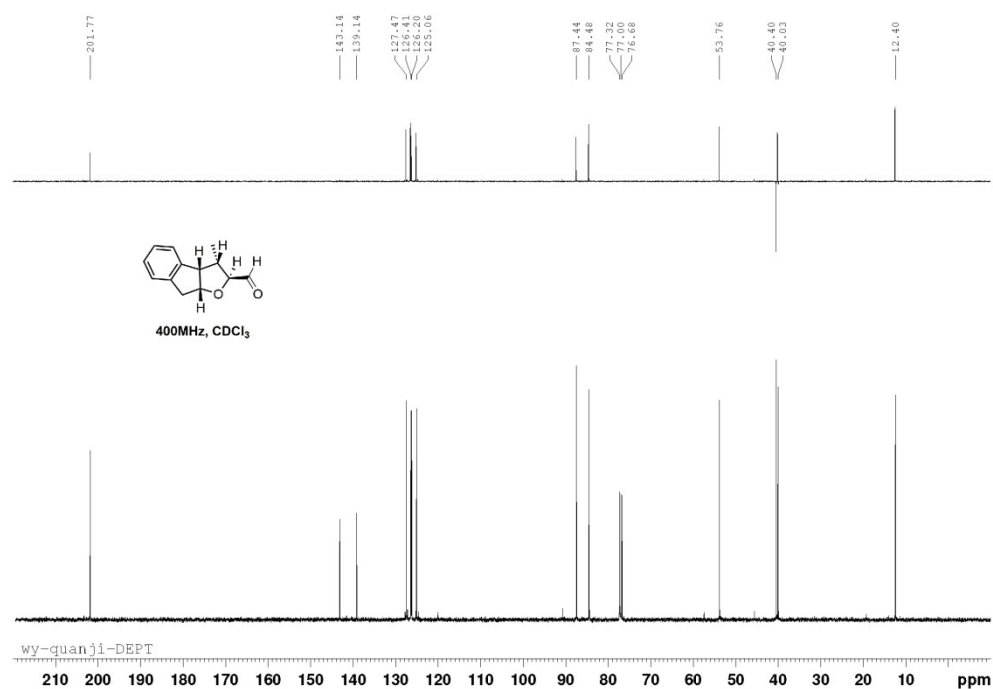



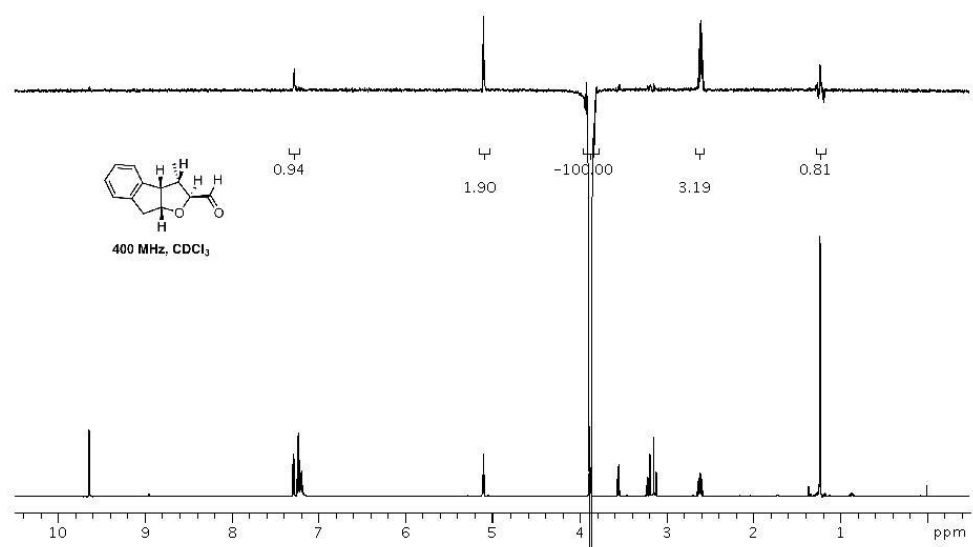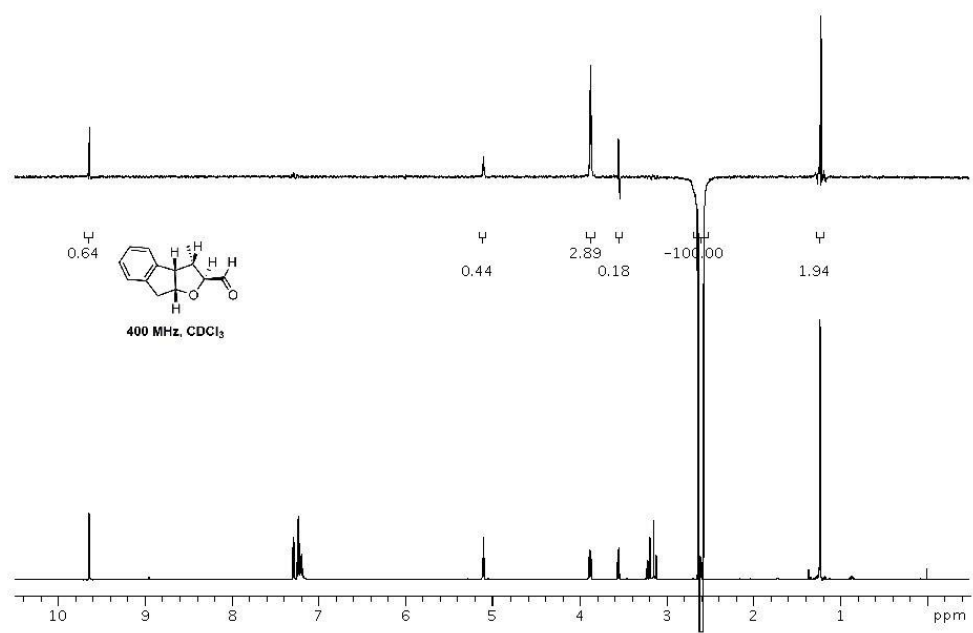

$^1\text{H}$  and  $^{13}\text{C}$  NMR spectra and NOE of compound 16:

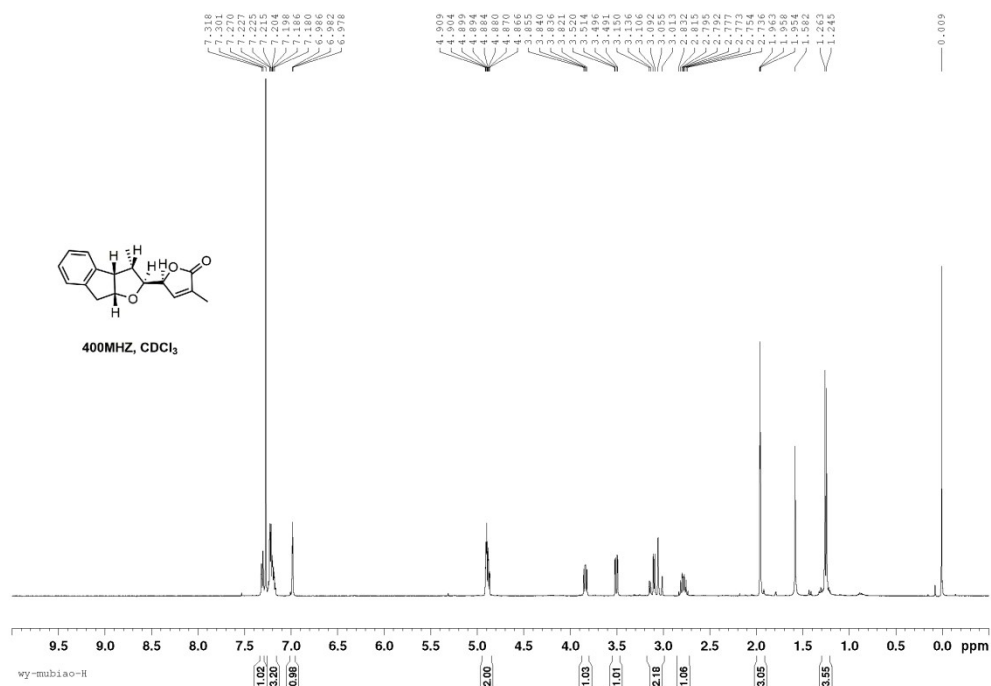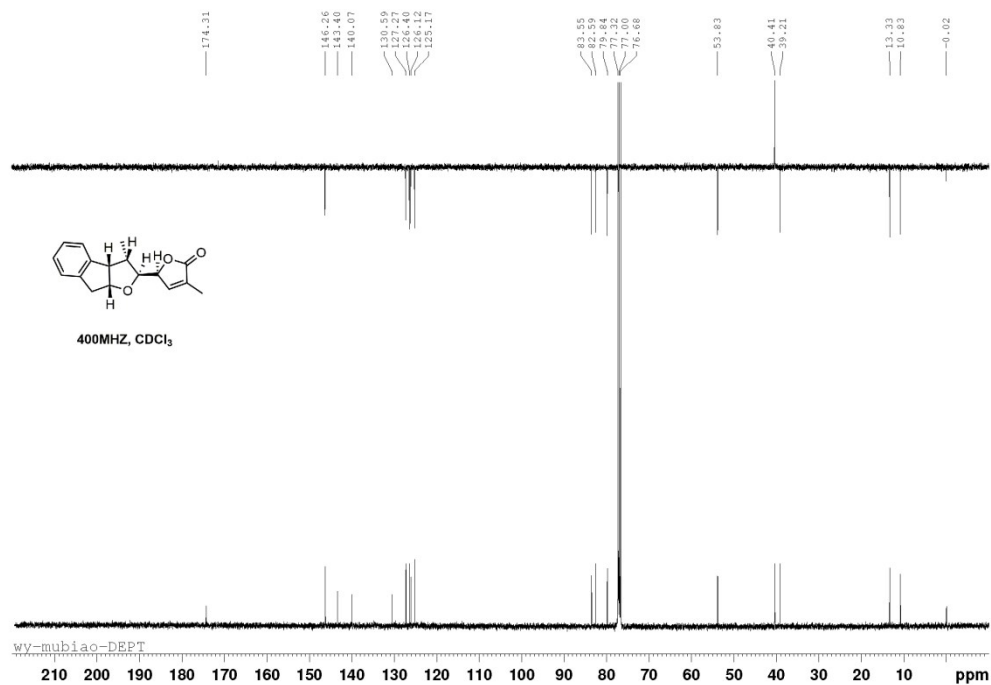

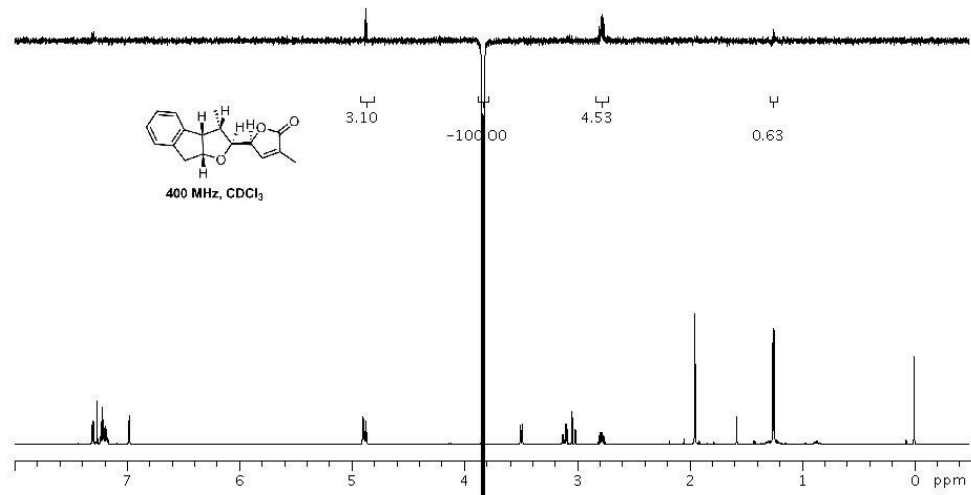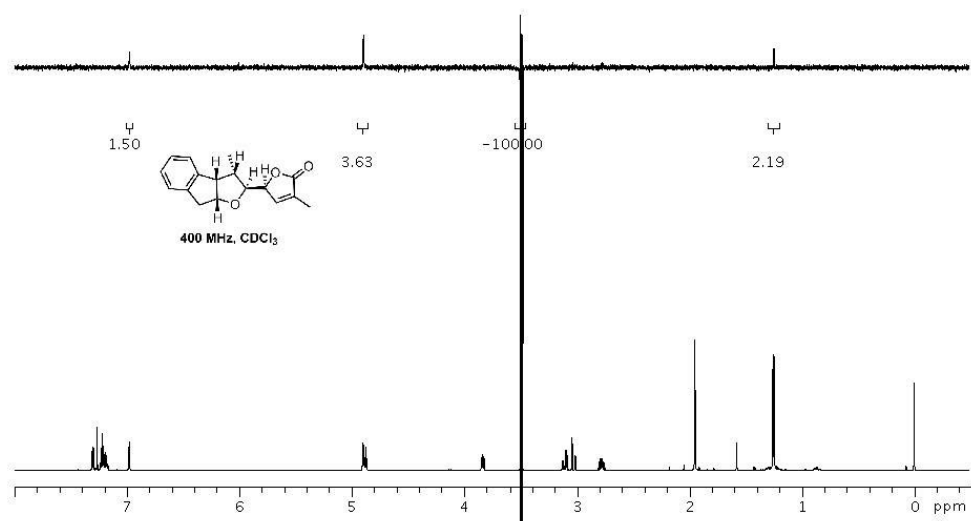

Supplement: c6qo00241b1.pdf [file c6qo00241b1.pdf]
